# Supplementary material
Source: Elsevier journal article supplement (https://sch130.ufanet.ru/images/MMC55.pdf)
Supplement: MMC55 [file MMC55.pdf]

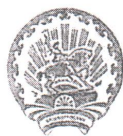

ҚАРАР

« 6 » апрель 2020 й.

№ 211

ПОСТАНОВЛЕНИЕ

« 6 » апреля 2020 г.

О внесении изменений в некоторые решения  
Правительства Республики Башкортостан

Правительство Республики Башкортостан ПОСТАНОВЛЯЕТ:

1. Утвердить прилагаемые изменения, вносимые в некоторые решения Правительства Республики Башкортостан (далее – изменения).
2. Установить, что подпункт «а» подпункта 2 пункта 1 и подпункт 1 пункта 2 изменений вступают в силу с 1 сентября 2020 года.

Глава  
Республики Башкортостан

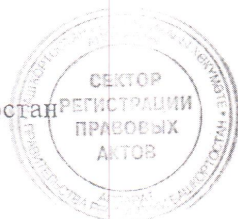

Р.Ф. Хабиров

Утверждены  
постановлением Правительства  
Республики Башкортостан  
от «6» апреля 2020 года  
№ 211

ИЗМЕНЕНИЯ,  
вносимые в некоторые решения Правительства  
Республики Башкортостан

1. В постановлении Кабинета Министров Республики Башкортостан от 11 марта 2002 года № 68 «О мерах по реализации Закона Республики Башкортостан "О государственной поддержке многодетных семей в Республике Башкортостан"» (с последующими изменениями):

1) в Положении о порядке предоставления денежной компенсации за приобретенную школьную форму либо заменяющий ее комплект детской одежды для посещения школьных занятий учащимся государственных и муниципальных общеобразовательных организаций, утвержденном указанным постановлением:

в пунктах 6, 17, 20, 22, 24 слова «Министерство образования Республики Башкортостан» в соответствующем падеже заменить словами «Министерство образования и науки Республики Башкортостан» в соответствующем падеже;

2) в Положении о порядке предоставления бесплатного питания учащимся государственных и муниципальных общеобразовательных организаций, государственных профессиональных образовательных организаций из многодетных семей, утвержденном указанным постановлением:

а) в абзаце первом пункта 6 слова «с 1 сентября 2016 года» заменить словами «с 1 сентября 2020 года»;

б) в пунктах 7, 20, 21, 23 и 26 слова «Министерство образования Республики Башкортостан» в соответствующем падеже заменить словами «Министерство образования и науки Республики Башкортостан» в соответствующем падеже;

3) в Положении о порядке предоставления набора школьно-письменных принадлежностей первоклассникам из многодетных семей, утвержденном указанным постановлением:

в пунктах 4, 5, 15, 18 и 20 слова «Министерство образования Республики Башкортостан» в соответствующем падеже заменить

словами «Министерство образования и науки Республики Башкортостан» в соответствующем падеже.

2. В распоряжении Правительства Республики Башкортостан от 15 сентября 2016 года № 1031-р:

1) пункт 1 изложить в следующей редакции:

«1. Установить размер стоимости питания с 1 сентября 2020 года для обучающихся из многодетных малоимущих семей в государственных и муниципальных общеобразовательных организациях, государственных профессиональных организациях в сумме 55,00 рублей на 1 обучающегося на 1 учебный день.»;

2) пункт 2 исключить;

3) пункт 3 считать пунктом 2 и изложить в следующей редакции:

«2. Контроль за исполнением настоящего распоряжения возложить на заместителя Премьер-министра Правительства Республики Башкортостан Ягафарова Ф.М.»;

4) пункт 4 считать пунктом 3 и изложить его следующей редакции:

«3. Настоящее распоряжение распространяется на правоотношения, возникшие с 1 сентября 2020 года.».
